# Supplementary material for: Genomic and proteomic characterization of vB_SauM-UFV_DC4, a novel Staphylococcus jumbo phage
Source: PubMed Central journal article supplement (PMC10638138; doi:10.1007/s00253-023-12743-6), 2023-09-23

**Genomic and proteomic characterization of vB\_SauM-UFV\_DC4, a novel  
*Staphylococcus jumbo* phage**

Jéssica Duarte da Silva<sup>1</sup>, Luís D. R. Melo<sup>2,3</sup>, Sílvio B. Santos<sup>2,3</sup>, Andrew M. Kropinski<sup>4</sup>, Mariana Fonseca Xisto<sup>5</sup>, Roberto Sousa Dias<sup>5</sup>, Isabela da Silva Paes<sup>5</sup>, Marcella Silva Vieira<sup>5</sup>, José Júnior Ferreira Soares<sup>5</sup>, Davide Porcellato<sup>6</sup>, Vinicius da Silva Duarte<sup>1,6</sup>, Sérgio Oliveira de Paula<sup>5</sup>

<sup>1</sup> Department of Microbiology, Federal University of Viçosa, Av. Peter Henry Rolfs, s/n, Campus Universitário, 36570-900, Viçosa, Minas Gerais, Brazil

<sup>2</sup> Centre of Biological Engineering – CEB, University of Minho, 4710-057, Braga, Portugal

<sup>3</sup> LABBELS – Associate Laboratory, Braga, Portugal

<sup>4</sup> Department of Pathobiology, University of Guelph, Guelph, Ontario, N1G 2W1, Canada

<sup>5</sup> Department of General Biology, Federal University of Viçosa, Av. Peter Henry Rolfs, s/n, Campus Universitário, 36570-900, Viçosa, Minas Gerais, Brazil

<sup>6</sup> Faculty of Chemistry, Biotechnology and Food Science, The Norwegian University of Life Sciences, P.O. Box 5003, 1432, Ås, Norway

\*Corresponding author: [vinicius.da.silva.duarte@nmbu.no](mailto:vinicius.da.silva.duarte@nmbu.no)

**Table S1** – *S. aureus* isolates and their corresponding source. Positive and negative stand, respectively, for the identification or not of lysis plaques following spot test assay.

| <b>Source of isolation</b> | <b>Isolate</b>              | <b>vB_SauM_UFV_DC4</b> |
|----------------------------|-----------------------------|------------------------|
| Human hospital             | <i>S. aureus</i> 10         | -                      |
|                            | <i>S. aureus</i> 67         | -                      |
|                            | <i>S. aureus</i> 112        | -                      |
|                            | <i>S. aureus</i> 261        | +                      |
| Veterinary hospital        | <i>S. aureus</i> 552        | -                      |
|                            | <i>S. aureus</i> 574 HV     | +                      |
|                            | <i>S. aureus</i> 607 HV     | -                      |
|                            | <i>S. aureus</i> 724.2      | -                      |
|                            | <i>S. aureus</i> 3059       | +                      |
|                            | <i>S. aureus</i> 3907       | +                      |
|                            | <i>S. aureus</i> 1334       | +                      |
|                            | <i>S. aureus</i> ATCC 33591 | +                      |
|                            | <i>S. aureus</i> 222        | +                      |
|                            | <i>S. aureus</i> O46        | +                      |
|                            | <i>S. aureus</i> 3.2        | +                      |
|                            | <i>S. aureus</i> 32/2       | +                      |
|                            | <i>S. aureus</i> 4182       | +                      |
|                            | <i>S. aureus</i> 4081       | +                      |
| Meat products              | <i>S. aureus</i> 3          | -                      |
|                            | <i>S. aureus</i> 145.2      | -                      |
|                            | <i>S. aureus</i> 148.1      | -                      |
|                            | <i>S. aureus</i> 177.2      | -                      |
| Environment                | <i>S. aureus</i> 25.1       | -                      |
|                            | <i>S. aureus</i> 84.1       | -                      |
|                            | <i>S. aureus</i> 178.2      | -                      |
|                            | <i>S. aureus</i> 181.1      | -                      |

**Table S2** – Detailed information of the 83 whole-genome sequences (74 *Staphylococcus* phages and 9 *Bacillus* phages) downloaded from the National Center for Biotechnology Information (NCBI:taxid10239) using inphared (INfrastructure for a PHAge REference Database, release 3Oct2021).

| Accession | Description                      | Genome Length (bp) | Jumbo phage | Mol GC (%) | Number CDS | Coding Capacity (%) | tRNAs | Host           | Genus          | Family     |
|-----------|----------------------------------|--------------------|-------------|------------|------------|---------------------|-------|----------------|----------------|------------|
| EF583821  | Bacillus phage 0305phi8-36       | 218948             | TRUE        | 41,8       | 245        | 94,8                | 0     | Bacillus       | Unclassified   | Myoviridae |
| JN638751  | Bacillus virus G                 | 497513             | TRUE        | 29,9       | 669        | 87,7                | 17    | Bacillus       | Donellivirus   | -          |
| KT624200  | Bacillus phage SP-15             | 221908             | TRUE        | 38,6       | 310        | 90,8                | 0     | Bacillus       | Thornevirus    | -          |
| KT895374  | Bacillus phage vB_BpuM-BpSp      | 255569             | TRUE        | 25,9       | 314        | 91,6                | 0     | Bacillus       | Takahashivirus | -          |
| KU878088  | Bacillus phage AR98              | 251042             | TRUE        | 27,8       | 296        | 89,6                | 1     | Bacillus       | Takahashivirus | -          |
| LC597490  | Bacillus phage vB_BceM_WH1       | 229829             | TRUE        | 37,2       | 299        | 93,2                | 0     | Bacillus       | Unclassified   | Myoviridae |
| MF360957  | Bacillus virus PBS17             | 252197             | TRUE        | 27,7       | 299        | 89,8                | 1     | Bacillus       | Takahashivirus | -          |
| MN091626  | Staphylococcus phage PALS_2      | 268748             | TRUE        | 25,1       | 274        | 91,8                | 1     | Staphylococcus | Unclassified   | Myoviridae |
| MW218148  | Staphylococcus phage vB_StaM_SA1 | 260727             | TRUE        | 26,8       | 256        | 92,6                | 0     | Staphylococcus | Unclassified   | Myoviridae |
| MW248466  | Staphylococcus phage MarsHill    | 266637             | TRUE        | 25,2       | 267        | 91,1                | 0     | Staphylococcus | Unclassified   | Myoviridae |
| MW349128  | Staphylococcus phage Machias     | 274478             | TRUE        | 24,8       | 283        | 89,9                | 1     | Staphylococcus | Unclassified   | Myoviridae |
| MW349129  | Staphylococcus phage Madawaska   | 265446             | TRUE        | 25,1       | 267        | 91,5                | 1     | Staphylococcus | Unclassified   | Myoviridae |

|          |                                      |        |       |      |     |      |   |                |                  |                 |
|----------|--------------------------------------|--------|-------|------|-----|------|---|----------------|------------------|-----------------|
| MW749003 | Bacillus phage vB_BspM_Internexus    | 252262 | TRUE  | 27,7 | 291 | 88,4 | 1 | Bacillus       | Takahashivirus   | -               |
| MW749006 | Bacillus phage vB_BspM_AgentSmith    | 200233 | TRUE  | 37,0 | 210 | 92,8 | 2 | Bacillus       | Unclassified     | Myoviridae      |
| MZ779063 | Staphylococcus phage vB_SauM-UFV_DC4 | 263185 | TRUE  | 25,0 | 261 | 91,9 | 1 | Staphylococcus | Unclassified     | Myoviridae      |
| AB626962 | Staphylococcus phage S24-1           | 18168  | FALSE | 28,9 | 21  | 94,2 | 0 | Staphylococcus | Rosenblumvirus   | Rountreeviridae |
| AB626963 | Staphylococcus phage S13'            | 18186  | FALSE | 29,2 | 21  | 94,0 | 0 | Staphylococcus | Rosenblumvirus   | Rountreeviridae |
| AF513032 | Staphylococcus virus 44AHJD          | 16784  | FALSE | 29,6 | 20  | 93,4 | 0 | Staphylococcus | Rosenblumvirus   | Rountreeviridae |
| AF513033 | Staphylococcus phage P68             | 18227  | FALSE | 29,3 | 20  | 93,5 | 0 | Staphylococcus | Rosenblumvirus   | Rountreeviridae |
| AY954949 | Staphylococcus phage 66              | 18199  | FALSE | 29,3 | 21  | 92,6 | 0 | Staphylococcus | Rosenblumvirus   | Rountreeviridae |
| CP018841 | Staphylococcus phage HOB 14.1.R1     | 18659  | FALSE | 32,9 | 37  | 89,4 | 0 | Staphylococcus | Unclassified     | Siphoviridae    |
| DQ834250 | Staphylococcus virus PH15            | 44041  | FALSE | 34,9 | 72  | 93,2 | 0 | Staphylococcus | Rockefellervirus | Siphoviridae    |
| EF462198 | Staphylococcus phage tp310-2         | 47785  | FALSE | 33,8 | 69  | 93,2 | 0 | Staphylococcus | Triavirus        | -               |
| EU136189 | Staphylococcus phage SAP-2           | 17938  | FALSE | 28,9 | 20  | 93,3 | 0 | Staphylococcus | Rosenblumvirus   | Rountreeviridae |
| HF937074 | Staphylococcus phage PSa3            | 17602  | FALSE | 29,6 | 19  | 94,0 | 0 | Staphylococcus | Rosenblumvirus   | Rountreeviridae |
| JN192400 | Staphylococcus virus IPLA5           | 43581  | FALSE | 34,7 | 75  | 95,0 | 0 | Staphylococcus | Rockefellervirus | Siphoviridae    |

|              |                                         |        |           |      |     |      |   |                |                  |                     |
|--------------|-----------------------------------------|--------|-----------|------|-----|------|---|----------------|------------------|---------------------|
| JN192401     | Staphylococcus virus<br>IPLA7           | 42123  | FALS<br>E | 34,8 | 65  | 95,4 | 0 | Staphylococcus | Rockefellervirus | Siphovirida<br>e    |
| JQ957932     | Staphylococcus phage<br>StauST398-2     | 45572  | FALS<br>E | 33,3 | 61  | 92,6 | 0 | Staphylococcus | Triavirus        | Siphovirida<br>e    |
| KF589919     | Staphylococcus phage<br>phiRS7          | 43394  | FALS<br>E | 34,3 | 63  | 92,8 | 0 | Staphylococcus | Unclassified     | Siphovirida<br>e    |
| KF598856     | Staphylococcus phage<br>YMC/09/04/R1988 | 44459  | FALS<br>E | 33,4 | 61  | 92,1 | 0 | Staphylococcus | Triavirus        | Siphovirida<br>e    |
| KF929199     | Staphylococcus phage<br>vB_SepS_SEP9    | 92417  | FALS<br>E | 29,6 | 128 | 87,1 | 1 | Staphylococcus | Sextaecvirus     | Siphovirida<br>e    |
| KJ210330     | Staphylococcus phage<br>GRCS            | 17869  | FALS<br>E | 28,9 | 20  | 92,1 | 0 | Staphylococcus | Rosenblumvirus   | Rountreevir<br>idae |
| KJ804259     | Staphylococcus phage<br>6ec             | 93794  | FALS<br>E | 29,3 | 139 | 88,6 | 1 | Staphylococcus | Sextaecvirus     | Siphovirida<br>e    |
| KM36610<br>0 | Staphylococcus phage<br>BP39            | 17641  | FALS<br>E | 29,0 | 21  | 94,2 | 0 | Staphylococcus | Rosenblumvirus   | Rountreevir<br>idae |
| KP735928     | Staphylococcus phage<br>IME-SA4         | 41843  | FALS<br>E | 34,0 | 65  | 96,2 | 0 | Staphylococcus | Unclassified     | Siphovirida<br>e    |
| KT429160     | Staphylococcus phage<br>SPbeta-like     | 127726 | FALS<br>E | 30,5 | 156 | 88,4 | 0 | Staphylococcus | Unclassified     | Siphovirida<br>e    |
| KU99291<br>1 | Staphylococcus phage<br>SLPW            | 17861  | FALS<br>E | 29,4 | 22  | 91,5 | 0 | Staphylococcus | Rosenblumvirus   | Rountreevir<br>idae |
| KX15676<br>2 | Staphylococcus phage<br>vB_SauS_IMEP5   | 44677  | FALS<br>E | 34,3 | 68  | 92,9 | 0 | Staphylococcus | Unclassified     | Siphovirida<br>e    |
| KY00008<br>4 | Staphylococcus phage<br>SCH1            | 18023  | FALS<br>E | 29,3 | 20  | 94,5 | 0 | Staphylococcus | Rosenblumvirus   | Rountreevir<br>idae |
| KY00008<br>5 | Staphylococcus phage<br>SCH111          | 18018  | FALS<br>E | 29,3 | 21  | 94,2 | 0 | Staphylococcus | Rosenblumvirus   | Rountreevir<br>idae |
| KY44206<br>3 | Staphylococcus phage<br>Andhra          | 18546  | FALS<br>E | 29,8 | 20  | 94,2 | 0 | Staphylococcus | Andhravirus      | Rountreevir<br>idae |

|          |                                        |        |       |      |     |      |   |                |                  |                 |
|----------|----------------------------------------|--------|-------|------|-----|------|---|----------------|------------------|-----------------|
| KY471386 | Staphylococcus phage St 134            | 18275  | FALSE | 30,1 | 20  | 95,4 | 0 | Staphylococcus | Andhravirus      | Rountreeviridae |
| KY653120 | Staphylococcus phage IME1348_01        | 42371  | FALSE | 34,7 | 65  | 96,3 | 0 | Staphylococcus | Rockefellervirus | Siphoviridae    |
| KY653124 | Staphylococcus phage IME1367_01        | 43135  | FALSE | 33,7 | 69  | 91,0 | 0 | Staphylococcus | Unclassified     | Siphoviridae    |
| KY653126 | Staphylococcus phage IME1354_01        | 42706  | FALSE | 34,2 | 64  | 96,0 | 0 | Staphylococcus | Unclassified     | Siphoviridae    |
| MG543995 | Staphylococcus phage UPMK_1            | 152788 | FALSE | 31,9 | 160 | 71,8 | 0 | Staphylococcus | Unclassified     | Siphoviridae    |
| MG766218 | Staphylococcus phage vB_SauP_phiAGO1.3 | 17603  | FALSE | 29,0 | 19  | 92,3 | 0 | Staphylococcus | Rosenblumvirus   | Rountreeviridae |
| MG766219 | Staphylococcus phage vB_SauP_phiAGO1.9 | 17637  | FALSE | 29,0 | 19  | 92,3 | 0 | Staphylococcus | Rosenblumvirus   | Rountreeviridae |
| MK075005 | Staphylococcus phage phiSP119-2        | 40011  | FALSE | 34,1 | 60  | 93,6 | 0 | Staphylococcus | Unclassified     | Siphoviridae    |
| MK075006 | Staphylococcus phage phiSP119-3        | 44311  | FALSE | 35,6 | 65  | 91,2 | 1 | Staphylococcus | Unclassified     | Siphoviridae    |
| MT423823 | Staphylococcus virus pSp_SNUABM-J      | 40224  | FALSE | 35,7 | 71  | 94,0 | 0 | Staphylococcus | Unclassified     | Siphoviridae    |
| MT596497 | Staphylococcus phage 456               | 43393  | FALSE | 34,7 | 73  | 91,6 | 0 | Staphylococcus | Rockefellervirus | -               |
| MT596498 | Staphylococcus phage vB_SepS_BE01      | 42718  | FALSE | 34,8 | 70  | 94,3 | 0 | Staphylococcus | Rockefellervirus | -               |
| MT596499 | Staphylococcus phage vB_SepS_BE02      | 95233  | FALSE | 29,4 | 140 | 87,9 | 1 | Staphylococcus | Sextaecvirus     | -               |
| MT724048 | Staphylococcus phage SAP3              | 41949  | FALSE | 35,4 | 64  | 93,9 | 0 | Staphylococcus | Rockefellervirus | -               |
| MT880872 | Staphylococcus phage PhiSepi-HH3       | 147057 | FALSE | 30,8 | 170 | 88,3 | 0 | Staphylococcus | Unclassified     | Siphoviridae    |

|           |                                       |       |       |      |    |      |   |                |                  |              |
|-----------|---------------------------------------|-------|-------|------|----|------|---|----------------|------------------|--------------|
| MW221967  | Staphylococcus phage PMBT9            | 41623 | FALSE | 36,2 | 65 | 94,8 | 0 | Staphylococcus | Rockefellervirus | -            |
| MZ488273  | Staphylococcus phage vB_SarS_BM31     | 42271 | FALSE | 34,6 | 67 | 94,6 | 0 | Staphylococcus | Unclassified     | Siphoviridae |
| NC_002661 | Staphylococcus virus phiSLT           | 42942 | FALSE | 33,3 | 68 | 93,0 | 0 | Staphylococcus | Triavirus        | -            |
| NC_004616 | Staphylococcus virus phi12            | 44970 | FALSE | 33,3 | 63 | 93,1 | 0 | Staphylococcus | Triavirus        | -            |
| NC_004740 | Staphylococcus phage phiN315          | 44082 | FALSE | 32,8 | 63 | 87,6 | 0 | Staphylococcus | Unclassified     | Siphoviridae |
| NC_007051 | Staphylococcus phage 2638A            | 41318 | FALSE | 36,9 | 55 | 92,6 | 0 | Staphylococcus | Fibralongavirus  | Siphoviridae |
| NC_007052 | Staphylococcus virus 42e              | 45861 | FALSE | 33,7 | 66 | 92,3 | 0 | Staphylococcus | Triavirus        | -            |
| NC_007053 | Staphylococcus virus 3a               | 43095 | FALSE | 33,5 | 62 | 94,1 | 0 | Staphylococcus | Triavirus        | -            |
| NC_007054 | Staphylococcus virus 47               | 44777 | FALSE | 33,5 | 61 | 92,8 | 0 | Staphylococcus | Triavirus        | -            |
| NC_011344 | Staphylococcus phage phi2958PVL       | 47342 | FALSE | 33,0 | 64 | 93,3 | 0 | Staphylococcus | Triavirus        | -            |
| NC_011612 | Staphylococcus virus IPLA35           | 45344 | FALSE | 33,2 | 63 | 93,1 | 0 | Staphylococcus | Triavirus        | -            |
| NC_028821 | Staphylococcus phage StB20-like       | 40670 | FALSE | 33,3 | 59 | 91,4 | 0 | Staphylococcus | Unclassified     | Siphoviridae |
| NC_028862 | Staphylococcus phage vB_SauS_phi2     | 44222 | FALSE | 33,7 | 60 | 93,8 | 0 | Staphylococcus | Triavirus        | Siphoviridae |
| NC_031241 | Staphylococcus phage CNP <sub>x</sub> | 43293 | FALSE | 34,7 | 69 | 95,3 | 0 | Staphylococcus | Rockefellervirus | Siphoviridae |
| NC_048192 | Staphylococcus phage vB_SpsS_QT1      | 43029 | FALSE | 36,9 | 55 | 93,2 | 0 | Staphylococcus | Fibralongavirus  | Siphoviridae |

|            |                                           |       |           |      |    |      |   |                |           |   |
|------------|-------------------------------------------|-------|-----------|------|----|------|---|----------------|-----------|---|
| NC_05503_8 | Staphylococcus phage SH-St 15644          | 45111 | FALS<br>E | 33,3 | 63 | 93,2 | 0 | Staphylococcus | Triavirus | - |
| NC_05503_9 | Staphylococcus phage vB_SauS_fPfSau02     | 45108 | FALS<br>E | 33,7 | 69 | 93,3 | 0 | Staphylococcus | Triavirus | - |
| NC_05504_0 | Staphylococcus phage vB_SauS_JS02         | 46435 | FALS<br>E | 33,1 | 67 | 91,5 | 0 | Staphylococcus | Triavirus | - |
| NC_05504_1 | Staphylococcus phage LH1                  | 46048 | FALS<br>E | 33,2 | 61 | 93,1 | 0 | Staphylococcus | Triavirus | - |
| NC_05504_2 | Staphylococcus phage P240                 | 45985 | FALS<br>E | 33,1 | 66 | 92,9 | 0 | Staphylococcus | Triavirus | - |
| NC_05504_3 | Staphylococcus phage SA137ruMSSAST121 PVL | 45999 | FALS<br>E | 33,3 | 62 | 93,2 | 0 | Staphylococcus | Triavirus | - |
| NC_05504_4 | Staphylococcus phage SAP11                | 45346 | FALS<br>E | 33,4 | 64 | 89,7 | 0 | Staphylococcus | Triavirus | - |
| NC_05504_5 | Staphylococcus phage phiSa2wa_st1         | 45585 | FALS<br>E | 33,3 | 61 | 94,2 | 0 | Staphylococcus | Triavirus | - |
| NC_05504_6 | Staphylococcus phage phiSa2wa_st5         | 44823 | FALS<br>E | 33,4 | 72 | 94,9 | 0 | Staphylococcus | Triavirus | - |
| NC_05504_7 | Staphylococcus phage phiSa2wa_st30        | 45780 | FALS<br>E | 33,4 | 60 | 93,5 | 0 | Staphylococcus | Triavirus | - |
| NC_05504_8 | Staphylococcus phage phiSa2wa_st78        | 45878 | FALS<br>E | 33,2 | 65 | 93,8 | 0 | Staphylococcus | Triavirus | - |
| NC_05504_9 | Staphylococcus phage phiSa2wa_st121mssa   | 45621 | FALS<br>E | 33,1 | 61 | 94,2 | 0 | Staphylococcus | Triavirus | - |



**Table S3** – Correlation analysis between selected variables obtained from inphared (INfrastructure for a PHAge REference Database, release 3Oct2021) for the 83 whole-genome sequences (74 *Staphylococcus* phages and 9 *Bacillus* phages, Supplementary Table 2).

| <b>Parameter1</b> | <b>Parameter2</b> | <b>r</b> | <b>95% CI</b> | <b>t(72)</b> | <b>p</b> |
|-------------------|-------------------|----------|---------------|--------------|----------|
| Genome size (kb)  | GC                | -0.59    | -0.72, -0.41  | -6.15        | < .001   |
| Genome size (kb)  | CDS               | 0.99     | 0.98, 0.99    | 50.89        | < .001   |
| Genome size (kb)  | Genes (+ strand)  | 0.07     | -0.16, 0.30   | 0.61         | > .999   |
| Genome size (kb)  | Genes (- strand)  | -0.07    | -0.30, 0.16   | -0.61        | > .999   |
| Genome size (kb)  | Coding capacity   | -0.36    | -0.54, -0.14  | -3.23        | 0.020    |
| Genome size (kb)  | tRNAs             | 0.59     | 0.42, 0.72    | 6.28         | < .001   |
| GC                | CDS               | -0.50    | -0.65, -0.30  | -4.85        | < .001   |
| GC                | Genes (+ strand)  | 0.45     | 0.25, 0.61    | 4.26         | < .001   |
| GC                | Genes (- strand)  | -0.45    | -0.61, -0.25  | -4.26        | < .001   |
| GC                | Coding capacity   | 0.21     | -0.02, 0.41   | 1.78         | 0.552    |
| GC                | tRNAs             | -0.47    | -0.63, -0.27  | -4.54        | < .001   |
| CDS               | Genes (+ strand)  | 0.11     | -0.12, 0.33   | 0.92         | > .999   |
| CDS               | Genes (- strand)  | -0.11    | -0.33, 0.12   | -0.92        | > .999   |
| CDS               | Coding capacity   | -0.37    | -0.55, -0.16  | -3.40        | 0.013    |
| CDS               | tRNAs             | 0.62     | 0.46, 0.75    | 6.79         | < .001   |
| Genes (+ strand)  | Negative          | -1.00    | -1.00, -1.00  | -Inf         | < .001   |
| Genes (+ strand)  | Coding capacity   | 0.30     | 0.08, 0.49    | 2.66         | 0.096    |
| Genes (+ strand)  | tRNAs             | -0.09    | -0.31, 0.14   | -0.78        | > .999   |
| Genes (- strand)  | Coding capacity   | -0.30    | -0.49, -0.08  | -2.66        | 0.096    |
| Genes (- strand)  | tRNAs             | 0.09     | -0.14, 0.31   | 0.78         | > .999   |
| Coding capacity   | tRNAs             | 0.28     | -0.48, -0.05  | -2.45        | 0.133    |

**Figure S1** - BLAST Ring Image Generator (BRIG) diagram showing the complete genome of five jumbo phages (colored concentric rings) infecting *S. aureus*. The phage DC4 served as a reference. The innermost circles represent the GC content (black) and GC skew (purple/green) of DC4 phage genome.

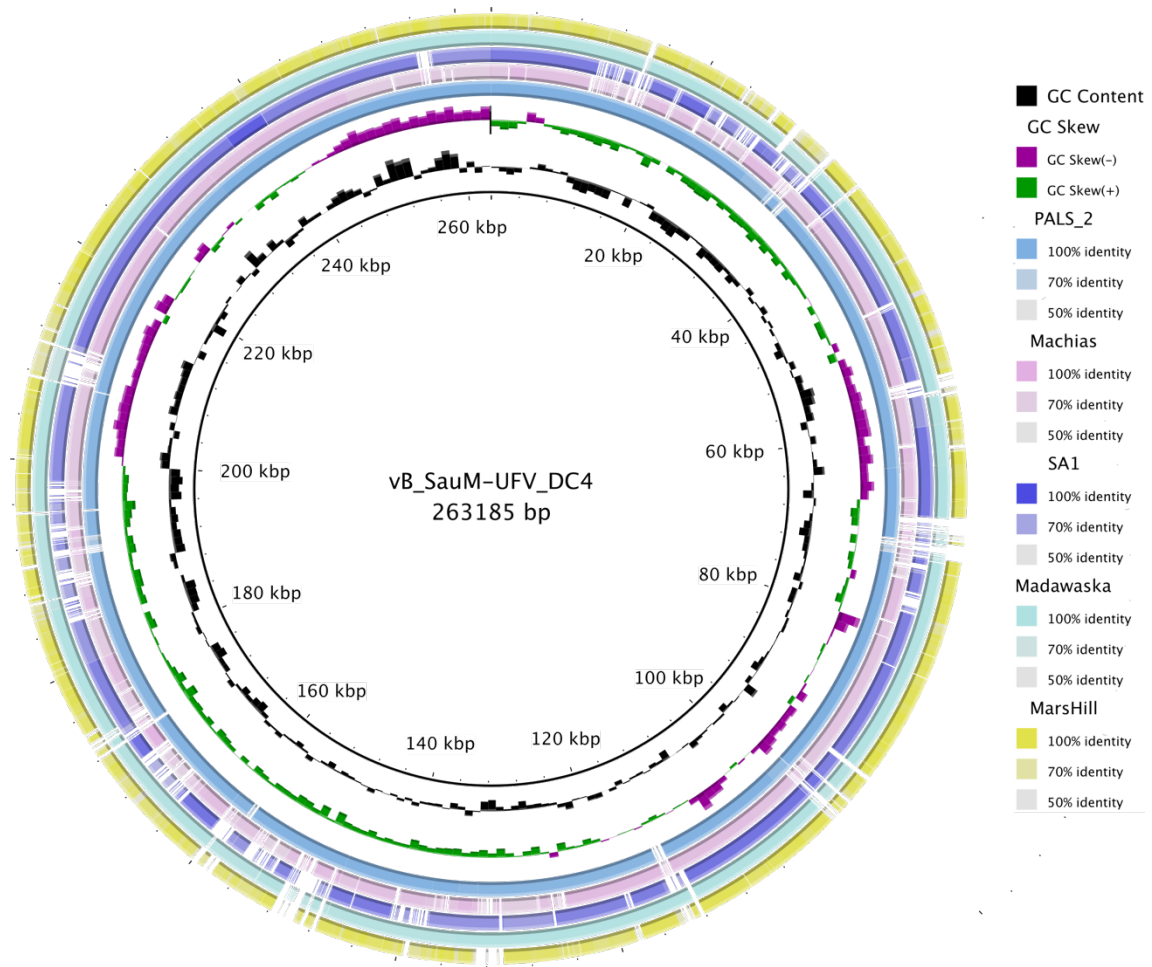

**Figure S2** – Genome alignment with progressive Mauve showing two Co-linear Blocks (LCB) between the viruses PALS2 and DC4. Mean pairwise identity over all pairs in the column: Green: 100% identity; Greeny-brown: 30% - 100% identity; Red: below 30% identity.

### LCB 1

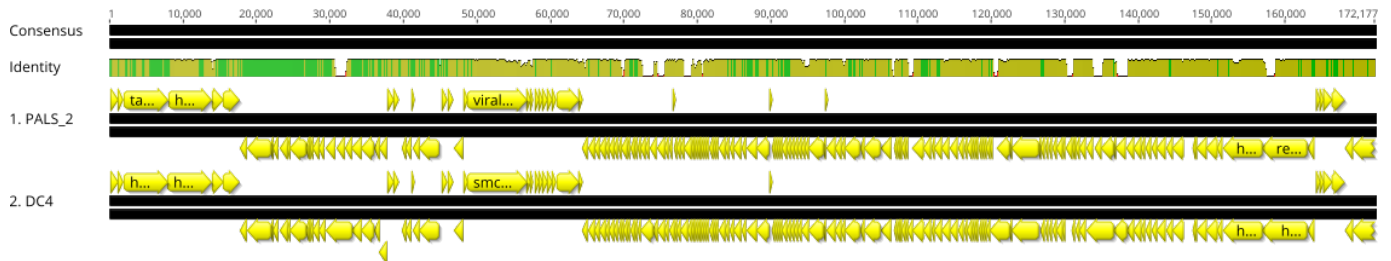

### LCB 2

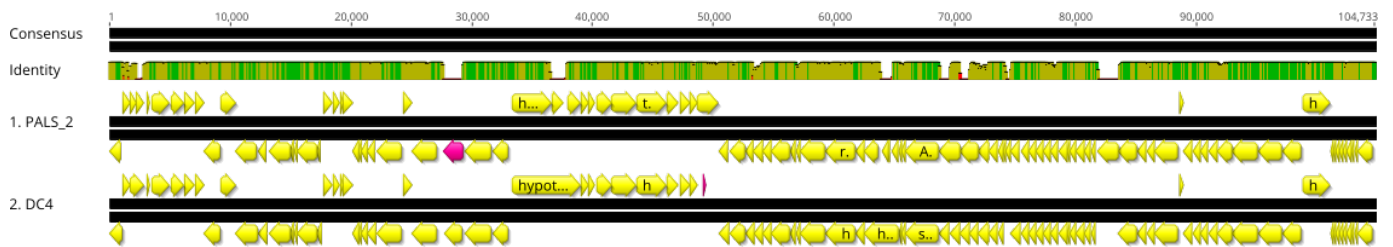

**Figure S3** – Frequency of codon usage based on the genomes of the phage DC4 and its hosts *S. aureus* 2030RH1 and 3059.

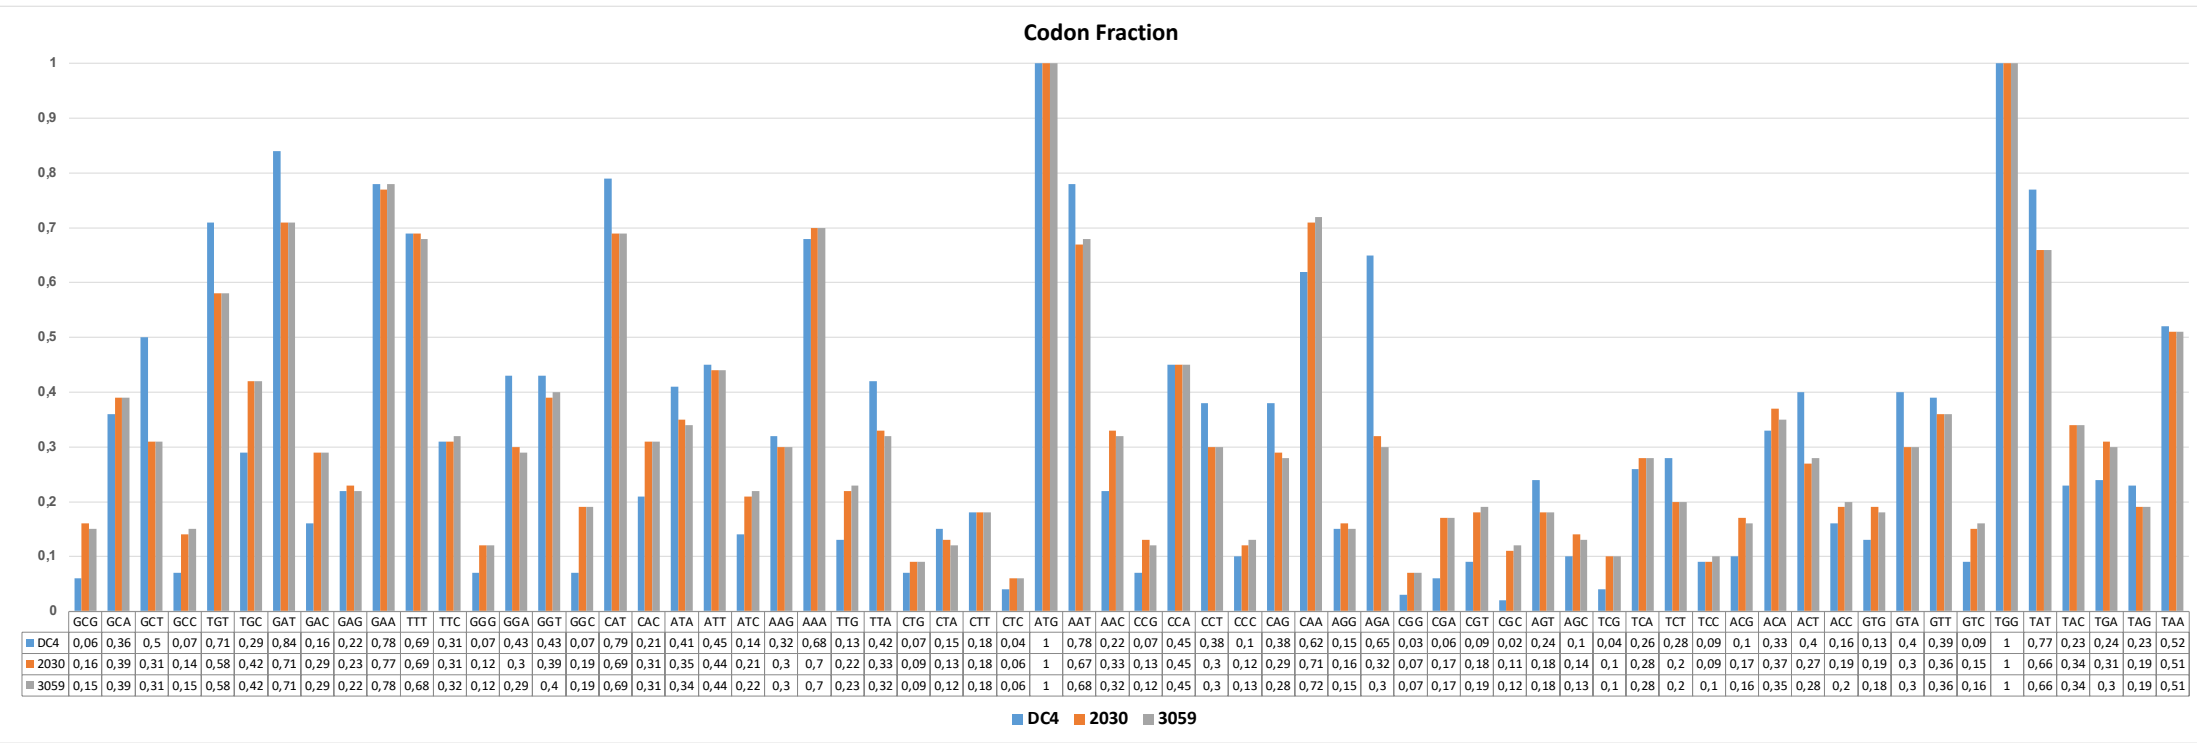

**Figure S4** – Comparative genome analysis for *S. aureus* jumbo phages performed by the OrthoVenn2 webserver. Venn diagram showing the distribution of shared gene families (orthologous clusters) among the six *S. aureus* jumbo phages (MarsHill, Machias, PALS2, DC4, Madawaska, and SA1). The cluster number in each component is listed.

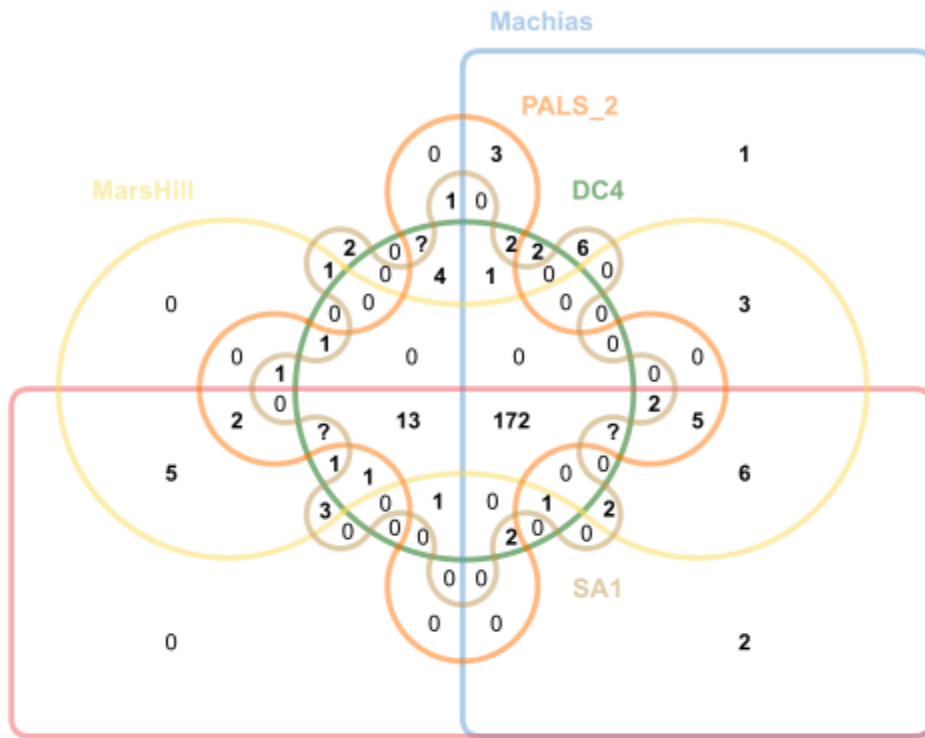

Madawaska

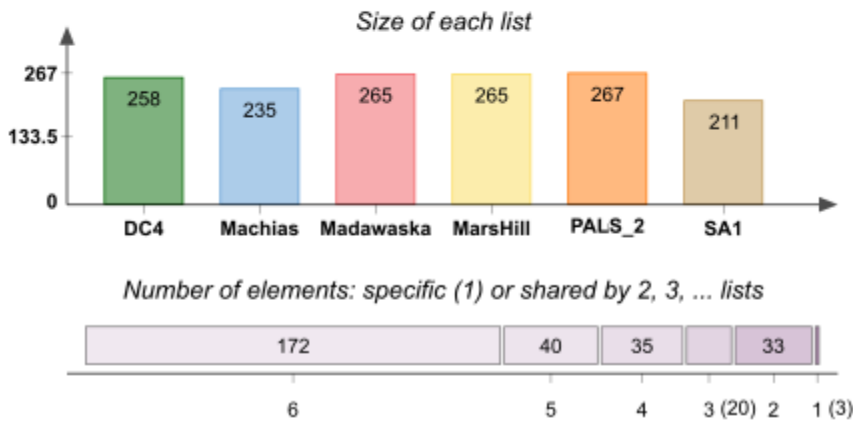

**Figure S5** – DC4 plaque formed in double-layer agar displays a clear lytic zone (arrows) with a surrounding halo indicative of phage-derived enzymes able to destroy bacterial cell wall components according to the host of incubation (arrowhead – **A**, **B**, and **E**). **A** – *S. aureus* O46; **B** – *S. aureus* 222; *S. aureus* 574 HV; *S. aureus* 1334; *S. aureus* 32/2; *S. aureus* 3907.

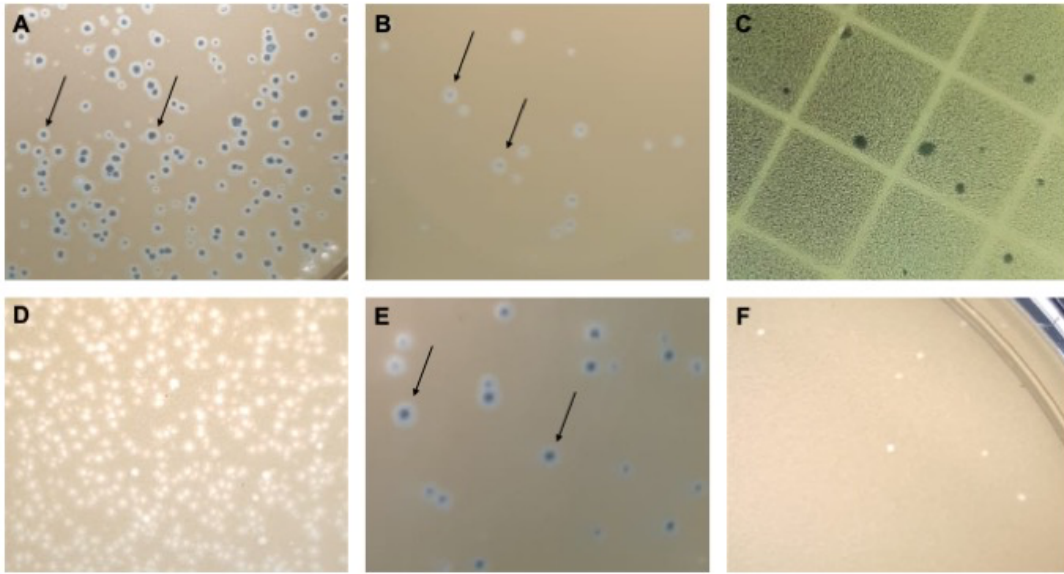

Supplement: 253_2023_12743_MOESM1_ESM.pdf [file 253_2023_12743_MOESM1_ESM.pdf]
